# Supplementary material for: As Technologies for Nucleotide Therapeutics Mature, Products Emerge
Source: PubMed Central journal article supplement — Mol Ther Nucleic Acids. 2017 Oct 28;9:379–86. doi: 10.1016/j.omtn.2017.10.017 (PMC5686430; doi:10.1016/j.omtn.2017.10.017), 2017-10-28
Supplement: mmc1.pdf [file mmc1.pdf]

**OMTN, Volume 9**

**Supplemental Information**

**As Technologies for Nucleotide Therapeutics**

**Mature, Products Emerge**

**Jennifer M. Beierlein, Laura M. McNamee, and Fred D. Ledley**

Supplemental Table S1

TIME model statistics for RNA therapeutic technologies

## Therapeutic Technologies

| Technology | Pubmed Search                                                                                        | T_I    | T_G    | T_E    | Nerr_ModelAvg | T_E_err |
|------------|------------------------------------------------------------------------------------------------------|--------|--------|--------|---------------|---------|
| ONTs       | antisense oligonucleotides OR "ribozyme" OR (("rna interference") OR "rna interference"[MeSH Terms]) | 1972.7 | 1988.2 | 2003.8 | 0.07          | 0.5     |
| ASO        | antisense oligonucleotides                                                                           | 1979.8 | 1987.6 | 1995.4 | 0.04          | 0.2     |
| RNAi       | "rna interference" OR "rna interference"[MeSH Terms]                                                 | 1991.1 | 1998.5 | 2006.0 | 0.16          | 0.6     |
| Ribozyme   | "ribozyme"                                                                                           | 1980.1 | 1988.1 | 1996.0 | 0.04          | 0.2     |
| Aptamer    | rna aptamer or dna aptamer                                                                           | 1986.2 | 1999.5 | 2012.9 | 0.07          | 0.4     |
| siRNA      | "small interfering"[MeSH Terms] OR "short interfering rna"[All Fields]                               | 1994.4 | 2000.1 | 2005.9 | 0.1           | 0.4     |
| miRNA      | microrna                                                                                             | N/A    | N/A    | N/A    | N/A           | N/A     |
| CRISPR     | crispr                                                                                               | N/A    | N/A    | N/A    | N/A           | N/A     |

## Chemistry Technologies

| Technology                              | Pubmed Search                             | T_I    | T_G    | T_E    | Nerr_ModelAvg | T_E_err |
|-----------------------------------------|-------------------------------------------|--------|--------|--------|---------------|---------|
| phosphorodiamidate morpholino oligomers | phosphorodiamidate morpholino oligomers   | N/A    | N/A    | N/A    | N/A           | N/A     |
| phosphorothioate oligonucleotides       | phosphorothioate oligonucleotides         | 1982.1 | 1988.6 | 1995.1 | 0.06          | 0.4     |
| LNA                                     | locked nucleic acids                      | 1988.2 | 1997.9 | 2007.7 | 0.03          | 0.2     |
| 2'-OME                                  | 2'-O-methoxyethyl OR 2'-MOE OR 2'-O-alkyl | 1988.7 | 1995.7 | 2002.7 | 0.07          | 0.6     |

## Molecular Target Technologies

| Technology    | Pubmed Search                                | T_I    | T_G    | T_E    | Nerr_ModelAvg | T_E_err | Therapeutic | Therapeutic Approval Year | Therapeutic Technology |
|---------------|----------------------------------------------|--------|--------|--------|---------------|---------|-------------|---------------------------|------------------------|
| CMV_IE2       | cytomegalovirus ul123 OR cytomegalovirus ie2 | 1979.7 | 1988.4 | 1997.2 | 0.06          | 0.5     | fomivirsen  | 1998                      | ASO                    |
| IRS 1         | insulin receptor substrate 1                 | 1975.8 | 1987.4 | 1999.0 | 0.07          | 0.5     |             |                           | ASO                    |
| CSF 2         | colony stimulating factor 2                  | 1971.9 | 1981.0 | 1990.2 | 0.08          | 0.5     |             |                           | ASO                    |
| SMAD 7        | smad 7                                       | 1988.9 | 1997.9 | 2007.0 | 0.13          | 0.7     |             |                           | ASO                    |
| Transthyretin | transthyretin                                | N/A    | N/A    | N/A    | N/A           | N/A     |             |                           | RNAi/ASO               |

|                          |                                                                                      |        |        |        |      |     |            |      |  |                  |
|--------------------------|--------------------------------------------------------------------------------------|--------|--------|--------|------|-----|------------|------|--|------------------|
| p53                      | tumor protein p53                                                                    | 1973.6 | 1985.5 | 1997.4 | 0.13 | 0.7 |            |      |  | RNAi/ASO         |
| Clusterin                | clusterin                                                                            | 1966.5 | 1984.8 | 2003.1 | 0.15 | 1.5 |            |      |  | ASO              |
| SMN 2                    | ((survival motor neuron 2) OR smn2) OR "survival motor neuron protein 2"[MeSH Terms] | 1967.4 | 1986.4 | 2005.3 | 0.02 | 0.2 | nusinersen | 2016 |  | ASO              |
| Dystrophin               | dystrophin                                                                           | 1968.9 | 1981.9 | 1995.0 | 0.15 | 1.3 | eteplirsen | 2016 |  | ASO              |
| Toll-like receptor 9     | toll-like receptor 9                                                                 | 1994.2 | 2000.7 | 2007.1 | 0.09 | 0.4 |            |      |  | ASO              |
| Fms-like tyrosine kinase | fms-like tyrosine kinase-1                                                           | 1992.8 | 2001.7 | 2010.6 | 0.07 | 0.4 |            |      |  | Ribozyme/RNAi    |
| Telomerase rna component | telomerase rna component                                                             | 1987.1 | 1993.4 | 1999.7 | 0.14 | 0.8 |            |      |  | Ribozyme         |
| VEGF                     | vegf-a                                                                               | 1981.3 | 1991.9 | 2002.5 | 0.06 | 0.3 | pegaptanib | 2004 |  | aptamer/RNAi/ASO |
| Bcl-2                    | bcl-2                                                                                | 1975.9 | 1987.6 | 1999.3 | 0.14 | 0.8 |            |      |  | RNAi/ASO         |
| PKC_alpha                | protein kinase c alpha                                                               | 1978.9 | 1988.7 | 1998.5 | 0.06 | 0.4 |            |      |  | ASO              |
| TGF beta 2               | transforming growth factor beta 2                                                    | 1979.6 | 1989.4 | 1999.2 | 0.09 | 0.6 |            |      |  | ASO              |
| Caspase 2                | caspase 2                                                                            | 1987.5 | 1994.8 | 2002.2 | 0.07 | 0.4 |            |      |  | RNAi             |
| nf kappa b p65           | nf kappa b p65                                                                       | 1979.6 | 1993.4 | 2007.1 | 0.08 | 0.6 |            |      |  | ASO              |
| Apolipoprotein ciii      | apolipoprotein ciii                                                                  | 1959.9 | 1975.1 | 1990.4 | 0.09 | 1.0 |            |      |  | RNAi/ASO         |
| Apolipoprotein b-100     | apolipoprotein b-100                                                                 | 1973.4 | 1983.7 | 1994.0 | 0.07 | 0.6 | mipomersen | 2003 |  | RNAi/ASO         |
| PDGFR                    | platelet-derived growth factor receptor                                              | 1963.1 | 1980.0 | 1996.8 | 0.13 | 1.1 |            |      |  | Aptamer          |
| Complement component 5   | complement component 5                                                               | 1953.9 | 1967.6 | 1981.3 | 0.09 | 0.9 |            |      |  | Aptamer          |
| Coagulation factor IX    | coagulation factor IX                                                                | 1924.3 | 1957.2 | 1990.2 | 0.04 | 0.6 |            |      |  | Aptamer          |
